# Supplementary material for: Molecular genetic diversity of seaweeds morphologically related to Ulva rigida at three sites along the French Atlantic coast
Source: PeerJ journal article supplement (doi:10.7717/peerj.11966), 2021-12-24

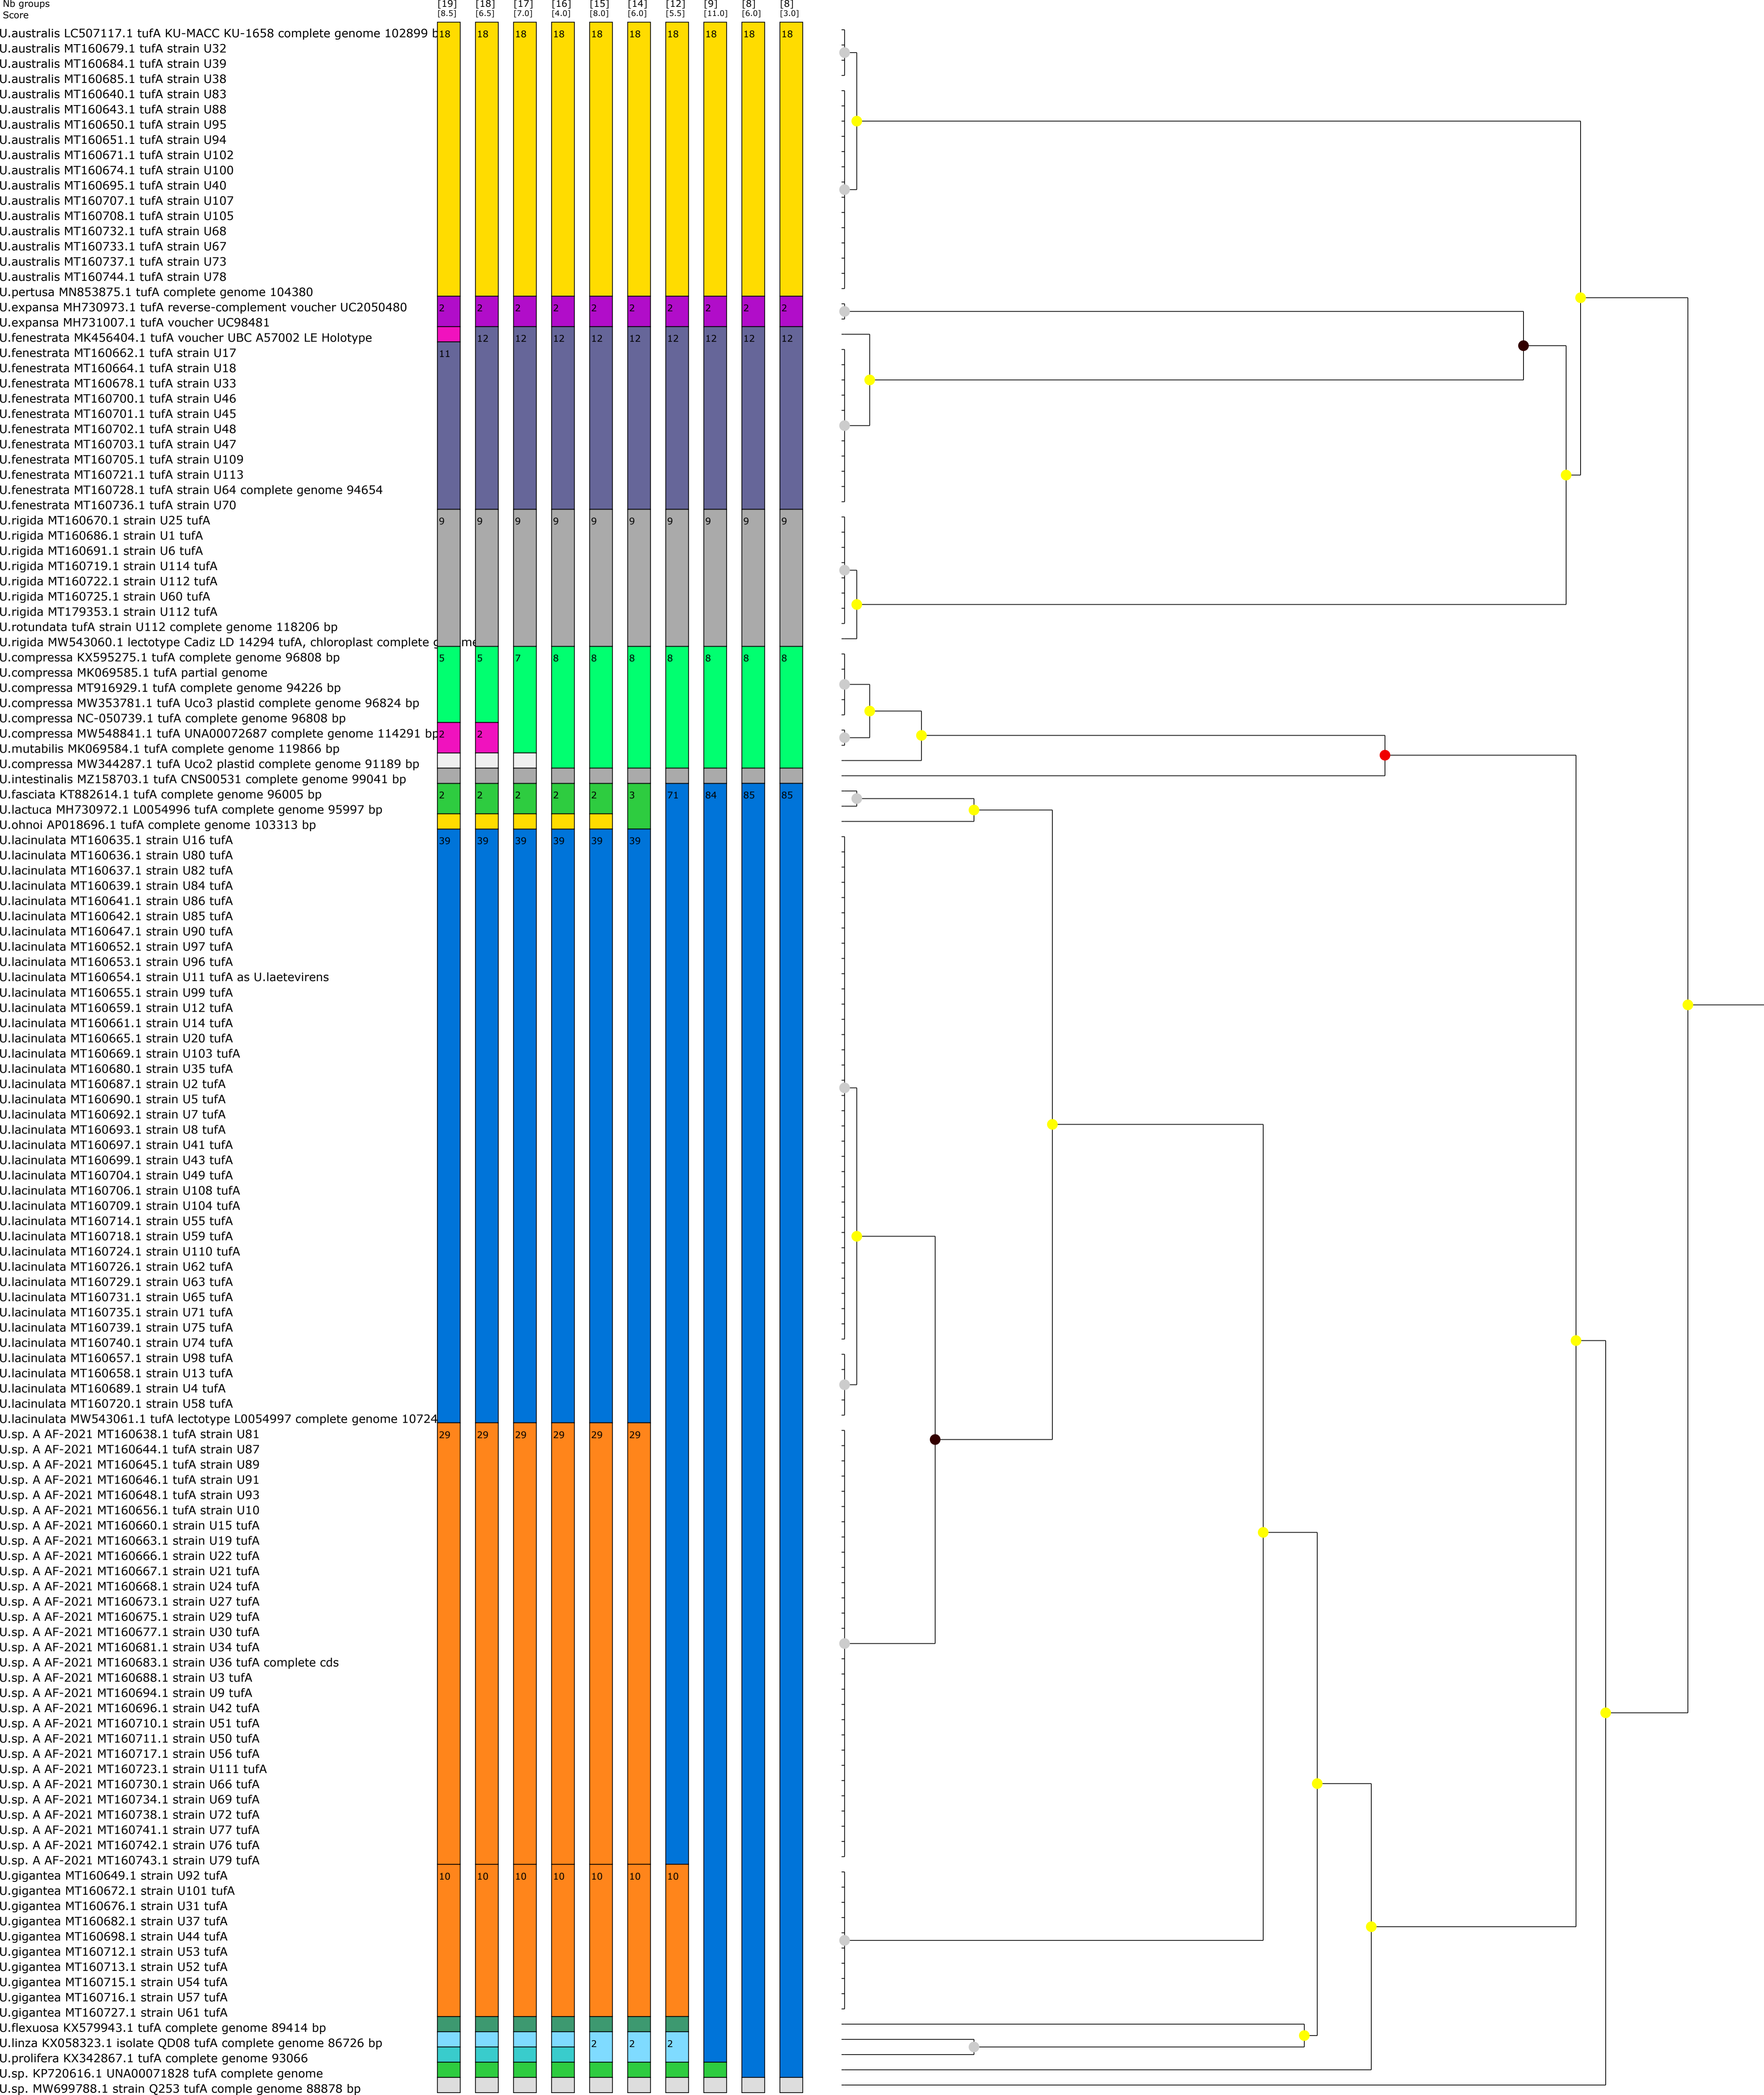

Supplement: Dartois_etal_S9_ASAP_Ulva_136_tufA_1224bp.pdf [file Dartois_etal_S9_ASAP_Ulva_136_tufA_1224bp.pdf]
