# Supplementary material for: Molecular genetic diversity of seaweeds morphologically related to Ulva rigida at three sites along the French Atlantic coast
Source: PubMed Central journal article supplement (PMC8711279; doi:10.7717/peerj.11966), 2021-12-24

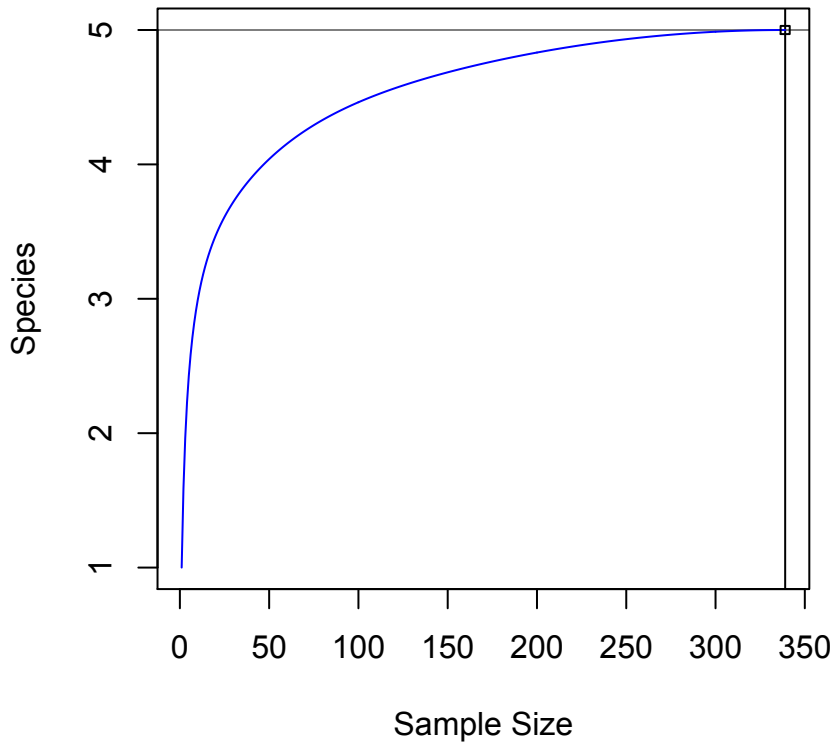

Supplement: peerj-09-11966-s004.pdf [file peerj-09-11966-s004.pdf]
